# Supplementary material for: Functional Characterization of Three GnRH Isoforms in Small Yellow Croaker Larimichthys polyactis Maintained in Captivity: Special Emphasis on Reproductive Dysfunction
Source: MDPI journal article supplement (doi:10.3390/biology11081200), 2022-08-10
Supplement: s1 [file s1]

**Supplementary Table S5.** List of primers used for qRT-PCR analysis of three GnRH isoforms and three GtH subunits in small yellow croaker.

| Primer Name                 | Nucleotide sequence (5'--- 3') | Accession No. | Size (bp) |
|-----------------------------|--------------------------------|---------------|-----------|
| crk-GnRH-1 (RT) Fw          | TCCTCAAACGTCGGCCATG            | OK042349.1    | 177       |
| crk-GnRH-1 (RT) Rv          | CAGTTCAGAACGCTGCAGG            |               |           |
| crk-GnRH-2 (RT) Fw          | ATGTGTGGGAGCTCAGCTG            | OK042350.1    | 198       |
| crk-GnRH-2 (RT) Rv          | TCCCTGGCTAAGGCATCCA            |               |           |
| crk-GnRH-3 (RT) Fw          | TGATGGTGCAGGTGTTGTTG           | OK042351.1    | 186       |
| crk-GnRH-3 (RT) Rv          | CTAAGTCTCTCTTGGGCTTG           |               |           |
| crk-FSH $\beta$ (RT) Fw     | GGCAACACCGAGTTCATCG            | MT239441.1    | 199       |
| crk- FSH $\beta$ (RT) Rv    | CGTTGCATGCGCTACACTC            |               |           |
| crk-LH $\beta$ (RT) Fw      | CATCACCAAGGACCCTGTC            | MW192797.1    | 198       |
| crk- LH $\beta$ (RT) Rv     | CTCTCGAAGGTGCTGTCAG            |               |           |
| crk-GP $\alpha$ (RT) Fw     | TGCACACTGAGCAAGAACAG           | MW192796.1    | 178       |
| crk-GP $\alpha$ (RT) Rv     | CCTCTATCTCGTAGCTGTGC           |               |           |
| crk- $\beta$ -Actin (RT) Fw | GCTGTCTTCCCATCCATCG            | MT330378      | 193       |
| crk- $\beta$ -Actin (RT) Rv | CGTTGTAGAAGGTGTGATGC           |               |           |
