# Supplementary material for: Functional Characterization of Three GnRH Isoforms in Small Yellow Croaker Larimichthys polyactis Maintained in Captivity: Special Emphasis on Reproductive Dysfunction
Source: MDPI journal article supplement (doi:10.3390/biology11081200), 2022-08-10
Supplement: s1 [file s1]

Molecular, Evolutionary and Functional Characterization of Three GnRH isoforms in Small Yellow Croaker *Larimichthys polyactis* Maintained in Captivity

**Supplementary Table S2.** Sequence information of GnRHs used for motif analysis of three GnRH isoforms.

| GnRH Isoform | Common Name          | Scientific Name                | GenBank Accession No. |                |
|--------------|----------------------|--------------------------------|-----------------------|----------------|
|              |                      |                                | Nucleotide            | Protein        |
| GnRH1        | Small yellow croaker | <i>Larimichthys polyactis</i>  | OK042349.1            | UFT26658.1     |
|              | Large yellow croaker | <i>Larimichthys crocea</i>     | NM_001303356.1        | NP_001290285.1 |
|              | Atlantic croaker     | <i>Micropogonias undulatus</i> | AY324668.2            | AAQ16501.2     |
|              | Red seabream         | <i>Pagrus major</i>            | D86582.1              | BAA13129.1     |
|              | Chub mackerel        | <i>Scomber japonicus</i>       | HQ108193.1            | ADP89591.1     |
|              | African cichlid      | <i>Haplochromis burtoni</i>    | AF076961.4            | AAC27716.1     |
|              | Tilapia              | <i>Oreochromis niloticus</i>   | AB101665.1            | BAC56849.1     |
| GnRH2        | Small yellow croaker | <i>Larimichthys polyactis</i>  | OK042350.1            | UFT26659.1     |
|              | Large yellow croaker | <i>Larimichthys crocea</i>     | KM232949.1            | AIU45792.1     |
|              | Atlantic croaker     | <i>Micropogonias undulatus</i> | AY324669.2            | AAQ16502.2     |
|              | Chub mackerel        | <i>Scomber japonicus</i>       | HQ108194.1            | ADP89592.1     |
|              | African cichlid      | <i>Haplochromis burtoni</i>    | AF076962.1            | AAC27717.1     |
|              | Tilapia              | <i>Oreochromis niloticus</i>   | AB101666.1            | BAC56850.1     |
| GnRH3        | Small yellow croaker | <i>Larimichthys polyactis</i>  | OK042351.1            | UFT26660.1     |
|              | Large yellow croaker | <i>Larimichthys crocea</i>     | KP159744.1            | AJY54663.1     |
|              | Atlantic croaker     | <i>Micropogonias undulatus</i> | AY324670.2            | AAQ16503.2     |
|              | Red seabream         | <i>Pagrus major</i>            | D26108.1              | BAA05104.1     |
|              | Chub mackerel        | <i>Scomber japonicus</i>       | HQ108195.1            | ADP89593.1     |
|              | African cichlid      | <i>Haplochromis burtoni</i>    | AF076963.1            | AAC27718.1     |
|              | Tilapia              | <i>Oreochromis niloticus</i>   | AB104863.2            | BAC65156.1     |
