# Supplementary material for: Functional Characterization of Three GnRH Isoforms in Small Yellow Croaker Larimichthys polyactis Maintained in Captivity: Special Emphasis on Reproductive Dysfunction
Source: MDPI journal article supplement (doi:10.3390/biology11081200), 2022-08-10
Supplement: s1 [file s1]

**Supplementary Table S3.** Sequence information of GnRHs used for multiple sequence alignment of three GnRH isoforms.

| GnRH Isoform | Common Name          | Scientific Name                | GenBank Accession No. |                |
|--------------|----------------------|--------------------------------|-----------------------|----------------|
|              |                      |                                | Nucleotide            | Protein        |
| GnRH1        | Small yellow croaker | <i>Larimichthys polyactis</i>  | OK042349.1            | UFT26658.1     |
|              | Atlantic croaker     | <i>Micropogonias undulatus</i> | AY324668.2            | AAQ16501.2     |
|              | Large yellow croaker | <i>Larimichthys crocea</i>     | NM_001303356.1        | NP_001290285.1 |
|              | Japanese anchovy     | <i>Engraulis japonicus</i>     | JX406273.1            | AFO70217.1     |
|              | African catfish      | <i>Clarias gariepinus</i>      | X78049.1              | CAA54971.1     |
|              | Japanese eel         | <i>Anguilla japonica</i>       | AB026989.1            | BAA82608.1     |
|              | Lake whitefish       | <i>Coregonus clupeaformis</i>  | AY245104.2            | AAP57221.1     |
|              | Japanese Medaka      | <i>Oryzias latipes</i>         | AB041333.1            | BAB16303.1     |
|              | Red seabream         | <i>Pagrus major</i>            | D86582.1              | BAA13129.1     |
| GnRH2        | Small yellow croaker | <i>Larimichthys polyactis</i>  | OK042350.1            | UFT26659.1     |
|              | Atlantic croaker     | <i>Micropogonias undulatus</i> | AY324669.2            | AAQ16502.2     |
|              | Large yellow croaker | <i>Larimichthys crocea</i>     | KM232949.1            | AIU45792.1     |
|              | Japanese anchovy     | <i>Engraulis japonicus</i>     | JX406274.1            | AFO70218.1     |
|              | African catfish      | <i>Clarias gariepinus</i>      | X78047.1              | CAA54969.1     |
|              | Japanese eel         | <i>Anguilla japonica</i>       | AB026990.1            | BAA82609.1     |
|              | Lake whitefish       | <i>Coregonus clupeaformis</i>  | AY245102.1            | AAP57219.1     |
|              | Japanese Medaka      | <i>Oryzias latipes</i>         | AB041330.1            | BAB16300.1     |
|              |                      |                                |                       |                |
| GnRH3        | Small yellow croaker | <i>Larimichthys polyactis</i>  | OK042351.1            | UFT26660.1     |
|              | Large yellow croaker | <i>Larimichthys crocea</i>     | KP159744.1            | AJY54663.1     |
|              | Atlantic croaker     | <i>Micropogonias undulatus</i> | AY324670.2            | AAQ16503.2     |
|              | Japanese anchovy     | <i>Engraulis japonicus</i>     | JX406275.1            | AFO70219.1     |
|              | Red seabream         | <i>Pagrus major</i>            | D26108.1              | BAA05104.1     |
|              | Lake whitefish       | <i>Coregonus clupeaformis</i>  | AY245103.1            | AAP57220.1     |
|              | Japanese Medaka      | <i>Oryzias latipes</i>         | AB041332.1            | BAB16302.1     |
