# Supplementary material for: Functional Characterization of Three GnRH Isoforms in Small Yellow Croaker Larimichthys polyactis Maintained in Captivity: Special Emphasis on Reproductive Dysfunction
Source: MDPI journal article supplement (doi:10.3390/biology11081200), 2022-08-10
Supplement: s1 [file s1]

**Supplementary Table S4.** Sequence information of GnRHs used for phylogenetic analysis of three GnRH isoforms.

| GnRH Isoform | Common Name          | Scientific Name                | GenBank Accession No. |                |
|--------------|----------------------|--------------------------------|-----------------------|----------------|
|              |                      |                                | Nucleotide            | Protein        |
| GnRH1        | Small yellow croaker | <i>Larimichthys polyactis</i>  | OK042349.1            | UFT26658.1     |
|              | Large yellow croaker | <i>Larimichthys crocea</i>     | NM_001303356.1        | NP_001290285.1 |
|              | Atlantic croaker     | <i>Micropogonias undulatus</i> | AY324668.2            | AAQ16501.2     |
|              | Japanese anchovy     | <i>Engraulis japonicus</i>     | JX406273.1            | AFO70217.1     |
|              | American shad        | <i>Alosa sapidissima</i>       | AF536381.1            | AAN04492.1     |
|              | Japanese eel         | <i>Anguilla japonica</i>       | AB026989.1            | BAA82608.1     |
|              | Lake whitefish       | <i>Coregonus clupeaformis</i>  | AY245104.2            | AAP57221.1     |
|              | European seabass     | <i>Dicentrarchus labrax</i>    | AF224279.1            | AAF62898.1     |
|              | Medaka               | <i>Oryzias latipes</i>         | AB041333.1            | BAB16303.1     |
|              | African cichlid      | <i>Haplochromis burtoni</i>    | AF076961.4            | AAC27716.1     |
|              | Tilapia              | <i>Oreochromis niloticus</i>   | AB101665.1            | BAC56849.1     |
|              | Chub mackerel        | <i>Scomber japonicus</i>       | HQ108193.1            | ADP89591.1     |
|              | Red seabream         | <i>Pagrus major</i>            | D86582.1              | BAA13129.1     |
|              | Pejerrey             | <i>Odontesthes bonariensis</i> | AY744689.1            | AAU94309.2     |
|              | Swamp eel            | <i>Monopterus albus</i>        | AY858056.1            | AAW51121.1     |
|              | African catfish      | <i>Clarias gariepinus</i>      | X78049.1              | CAA54971.1     |
| GnRH2        | Small yellow croaker | <i>Larimichthys polyactis</i>  | OK042350.1            | UFT26659.1     |
|              | Large yellow croaker | <i>Larimichthys crocea</i>     | KM232949.1            | AIU45792.1     |
|              | Atlantic croaker     | <i>Micropogonias undulatus</i> | AY324669.2            | AAQ16502.2     |
|              | Japanese anchovy     | <i>Engraulis japonicus</i>     | JX406274.1            | AFO70218.1     |
|              | Japanese eel         | <i>Anguilla japonica</i>       | AB026990.1            | BAA82609.1     |
|              | Lake whitefish       | <i>Coregonus clupeaformis</i>  | AY245102.1            | AAP57219.1     |
|              | Medaka               | <i>Oryzias latipes</i>         | AB041330.1            | BAB16300.1     |
|              | African cichlid      | <i>Haplochromis burtoni</i>    | AF076962.1            | AAC27717.1     |
|              | Tilapia              | <i>Oreochromis niloticus</i>   | AB101666.1            | BAC56850.1     |
|              | Chub mackerel        | <i>Scomber japonicus</i>       | HQ108194.1            | ADP89592.1     |
|              | European eel         | <i>Anguilla anguilla</i>       | GU332293.1            | ADD92005.1     |
|              | Pejerrey             | <i>Odontesthes bonariensis</i> | AY744687.1            | AAU94307.1     |
|              | Swamp eel            | <i>Monopterus albus</i>        | AY858054.1            | AAW51119.1     |
|              | African catfish      | <i>Clarias gariepinus</i>      | X78047.1              | CAA54969.1     |
|              | Chanchita            | <i>Cichlasoma dimerus</i>      | HQ444961.1            | ADV31310.1     |
|              | Zebrafish            | <i>Danio rerio</i>             | AY657018.1            | AAU43784.1     |
| GnRH3        | Small yellow croaker | <i>Larimichthys polyactis</i>  | OK042351.1            | UFT26660.1     |
|              | Large yellow croaker | <i>Larimichthys crocea</i>     | KP159744.1            | AJY54663.1     |
|              | Atlantic croaker     | <i>Micropogonias undulatus</i> | AY324670.2            | AAQ16503.2     |
|              | Japanese anchovy     | <i>Engraulis japonicus</i>     | JX406275.1            | AFO70219.1     |
|              | Lake whitefish       | <i>Coregonus clupeaformis</i>  | AY245103.1            | AAP57220.1     |
|              | European seabass     | <i>Dicentrarchus labrax</i>    | AF224280.1            | AAF62899.1     |
|              | Medaka               | <i>Oryzias latipes</i>         | AB041332.1            | BAB16302.1     |
|              | African cichlid      | <i>Haplochromis burtoni</i>    | AF076963.1            | AAC27718.1     |
|              | Tilapia              | <i>Oreochromis niloticus</i>   | AB104863.2            | BAC65156.1     |
|              | Chub mackerel        | <i>Scomber japonicus</i>       | HQ108195.1            | ADP89593.1     |
|              | Red seabream         | <i>Pagrus major</i>            | D26108.1              | BAA05104.1     |
|              | Pejerrey             | <i>Odontesthes bonariensis</i> | AY744688.1            | AAU94308.1     |
|              | Swamp eel            | <i>Monopterus albus</i>        | AY858055.1            | AAW51120.1     |
|              | Chanchita            | <i>Cichlasoma dimerus</i>      | HQ444962.2            | ADV31311.2     |
|              | Zebrafish            | <i>Danio rerio</i>             | AJ304429.1            | CAC18539.1     |
