# Supplementary material for: Functional Characterization of Three GnRH Isoforms in Small Yellow Croaker Larimichthys polyactis Maintained in Captivity: Special Emphasis on Reproductive Dysfunction
Source: MDPI journal article supplement (doi:10.3390/biology11081200), 2022-08-10
Supplement: s1 [file s1]

**Functional Characterization of Three GnRH Isoforms in Small Yellow Croaker *Larimichthys polyactis* Maintained in Captivity : Special Emphasis to Reproductive Dysfunction**

**Table S6.** Percent (%) identity and similarity of amino acid sequences of three GnRH isoforms of small yellow croaker with those of other selected teleost species. Identity and similarity of corresponding GnRH isoform are shown with bold letters.

| GnRH forms          | Species              | Percent (%) Identity & Similarity |       |        |        |       |       | NCBI Protein ID |
|---------------------|----------------------|-----------------------------------|-------|--------|--------|-------|-------|-----------------|
|                     |                      | Small Yellow Croaker              |       |        |        |       |       |                 |
|                     |                      | GnRH1                             |       | GnRH2  |        | GnRH3 |       |                 |
|                     |                      | Idnt.                             | Sim.  | Idnt.  | Sim.   | Idnt. | Sim.  |                 |
| GnRH1 (sb)          | Large yellow croaker | 97.78                             | 98.89 | 24.47  | 41.49  | 17.35 | 35.71 | NP_001290285    |
| GnRH1 (sb)          | Atlantic croaker     | 96.67                             | 98.89 | 24.47  | 41.49  | 17.35 | 35.71 | AAQ16501        |
| GnRH1 (sb)          | Japanese mackerel    | 60.61                             | 71.72 | 28.00  | 40.00  | 17.65 | 30.39 | ADP89591        |
| GnRH1 (md)          | Japanese medaka      | 43.16                             | 56.84 | 20.00  | 31.58  | 15.31 | 32.65 | BAB16303        |
| GnRH1 (m)           | Japanese eel         | 37.98                             | 54.74 | 26.88  | 44.09  | 19.59 | 34.02 | BAA82608        |
| GnRH1 (wf)          | Laker whitefish      | 35.79                             | 51.58 | 25.53  | 43.62  | 22.45 | 35.71 | AAP57221        |
| GnRH1 (cf)          | African catfish      | 25.00                             | 39.13 | 25.84  | 42.70  | 18.75 | 32.29 | CAA54971        |
| GnRH1 (hr)          | Japanese anchovy     | 22.58                             | 41.94 | 26.67  | 47.78  | 22.45 | 34.69 | AFO70217        |
| GnRH2<br>(cGnRH-II) | Large yellow croaker | 24.47                             | 42.55 | 100.00 | 100.00 | 25.00 | 42.71 | AIU45792        |
|                     | Atlantic croaker     | 23.40                             | 42.55 | 98.82  | 100.00 | 25.00 | 42.71 | AAQ16502        |
|                     | Japanese mackerel    | 24.47                             | 41.49 | 94.12  | 95.29  | 27.08 | 42.71 | ADP89592        |
|                     | Japanese medaka      | 23.66                             | 40.86 | 78.82  | 83.53  | 24.21 | 37.89 | BAB16300        |
|                     | Japanese eel         | 25.53                             | 45.74 | 68.97  | 82.76  | 25.00 | 43.75 | BAA82609        |
|                     | Laker whitefish      | 23.40                             | 43.62 | 81.40  | 86.05  | 27.08 | 40.63 | AAP57219        |
|                     | African catfish      | 20.21                             | 38.30 | 68.60  | 81.40  | 27.08 | 39.58 | CAA54969        |
|                     | Japanese anchovy     | 23.40                             | 42.55 | 67.44  | 84.21  | 26.04 | 43.75 | AFO70218        |
| GnRH3<br>(sGnRH)    | Large yellow croaker | 18.18                             | 37.37 | 24.24  | 40.40  | 97.78 | 98.89 | AJY54663        |
|                     | Atlantic croaker     | 19.19                             | 37.37 | 24.24  | 40.40  | 95.56 | 97.78 | AAQ16503        |
|                     | Japanese mackerel    | 17.17                             | 35.35 | 21.21  | 38.38  | 90.00 | 92.22 | ADP89593        |
|                     | Japanese medaka      | 20.20                             | 38.38 | 22.22  | 42.42  | 82.22 | 90.00 | BAB16302        |
|                     | Laker whitefish      | 15.79                             | 31.58 | 18.48  | 36.96  | 63.33 | 72.22 | AAP57220        |
|                     | Japanese anchovy     | 23.53                             | 37.25 | 17.65  | 33.33  | 37.11 | 47.42 | AFO70219        |

\*Idnt., Identity; Sim., Similarity
