# Supplementary material for: Functional Characterization of Three GnRH Isoforms in Small Yellow Croaker Larimichthys polyactis Maintained in Captivity: Special Emphasis on Reproductive Dysfunction
Source: MDPI journal article supplement (doi:10.3390/biology11081200), 2022-08-10
Supplement: s1 [file s1]

**Supplementary Table S1.** List of primers used for full length cDNA cloning of three isoform of GnRH gene in small yellow croaker.

| Primer Name              | Nucleotide sequence (5'--- 3')                | Purpose                           |
|--------------------------|-----------------------------------------------|-----------------------------------|
| GnRH-1-Fw                | AAGCATGGCTCCTCAGACG                           | RT-PCR<br>(Partial<br>Sequencing) |
| GnRH-1-Rv                | GTCCAGAAATCCTTTCATCCT                         |                                   |
| GnRH-2-Fw                | TTGGGCTGCTTCTATGTGC                           |                                   |
| GnRH-2-Rv                | GCTTTCACCTTCCTCTTCTGG                         |                                   |
| GnRH-3-Fw                | AAGTGAGCAGCAGAGTGATG                          |                                   |
| GnRH-3-Rv                | CTTTCGGTCAAAATGACTGGA                         |                                   |
| crk-GnRH-1 -3'RACE       | GATTACGCCAAGCTTGCCTGGTCGTATGGACTGAGTCCA       | RACE PCR                          |
| crk-GnRH-1-5'RACE        | GATTACGCCAAGCTTTCAGAACGCTGCAGGGCGAGTCCA       |                                   |
| crk-GnRH-2 -3'RACE       | GATTACGCCAAGCTTGAGTGCCCAAGCCCAAGAGAGACTTAG    |                                   |
| crk-GnRH-2-5'RACE        | GATTACGCCAAGCTTCAGCTGAGCTCCCACACATAGAAGTAGC   |                                   |
| crk-GnRH-3 -3'RACE       | GATTACGCCAAGCTTGTATGGTCTAAGTCTCTCTTGGGCTTGG   |                                   |
| crk-GnRH-3-5'RACE        | GATTACGCCAAGCTTCCAACGCCAACAACAACACCTGCACC     |                                   |
| Universal Primer (Short) | CTAATACGACTCACTATAGGGC                        |                                   |
| Universal Primer (Long)  | CTAATACGACTCACTATAGGGCAAGCAGTGGTATCAACGCAGAGT |                                   |
| Oligo dT (OdT)           | GGCCACGCGTCGACTAGTACTTTTTTTTTTTTTTTTTT        | cDNA<br>Synthesis                 |
| Oligo dT Adaptor (AP)    | GGCCACGCGTCGACTAGTAC                          |                                   |

Molecular, Evolutionary and Functional Characterization of Three GnRH isoforms in Small Yellow Croaker *Larimichthys polyactis* Maintained in Captivity
